# Supplementary material for: Structural exploration of AuxM− (M = Si, Ge, Sn; x = 9–12) clusters with a revised genetic algorithm
Source: Royal Society of Chemistry journal article supplement (doi:10.1039/c9ra01019j), 2019-01-01
Supplement: c9ra01019j1.pdf [file c9ra01019j1.pdf]

### Supporting information:

**Fig. S1.** The simulated PES spectra of the top-five lowest-lying isomers of  $\text{Au}_9\text{Si}^-$  (left, a-e),  $\text{Au}_9\text{Ge}^-$  (middle, a-e), and  $\text{Au}_9\text{Sn}^-$  (right, a-e). For each species, the isomers are numbered from the top to bottom (i.e. a-e) as isomer 1 to 5 in accordance with those in Table 1. The relative energies of five low-lying isomers were obtained by PBE0/CRENBL level of theory (NWChem). The insets show the corresponding structures. The dopant atoms are shown in color (Si in blue, Ge in red, and Sn in black).

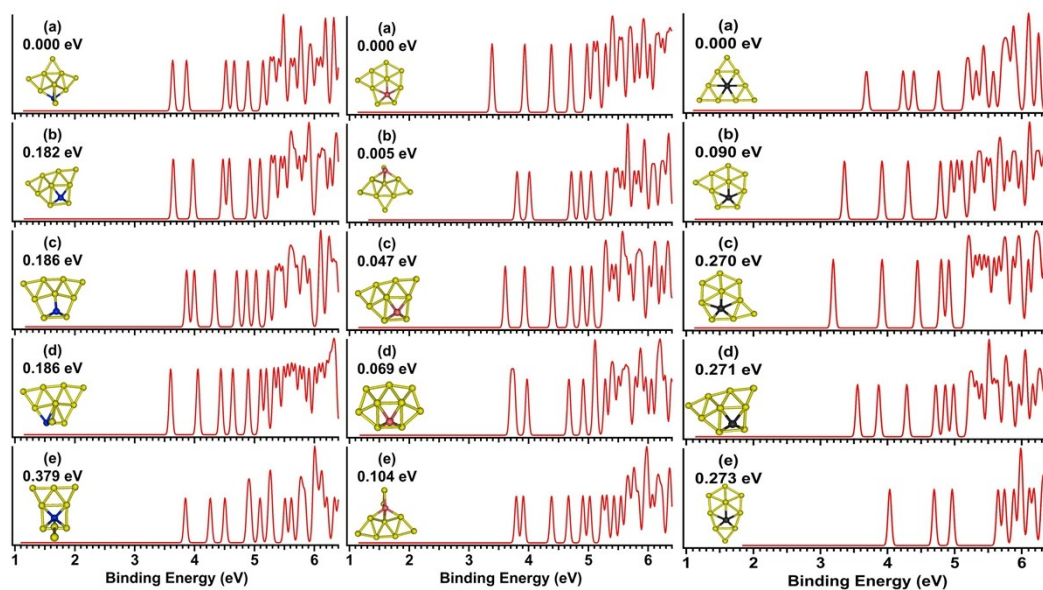

**Fig. S2.** The simulated PES spectra of the top-five lowest-lying isomers of  $\text{Au}_{10}\text{Si}^-$  (left, a-e),  $\text{Au}_{10}\text{Ge}^-$  (middle, a-e), and  $\text{Au}_{10}\text{Sn}^-$  (right, a-e). For each species, the isomers are numbered from the top to bottom (i.e. a-e) as isomer 1 to 5 in accordance with those in Table 2. The relative energies of five low-lying isomers were obtained by PBE0/CRENBL level of theory (NWChem). The insets show the corresponding structures. The dopant atoms are shown in color (Si in blue, Ge in red, and Sn in black).

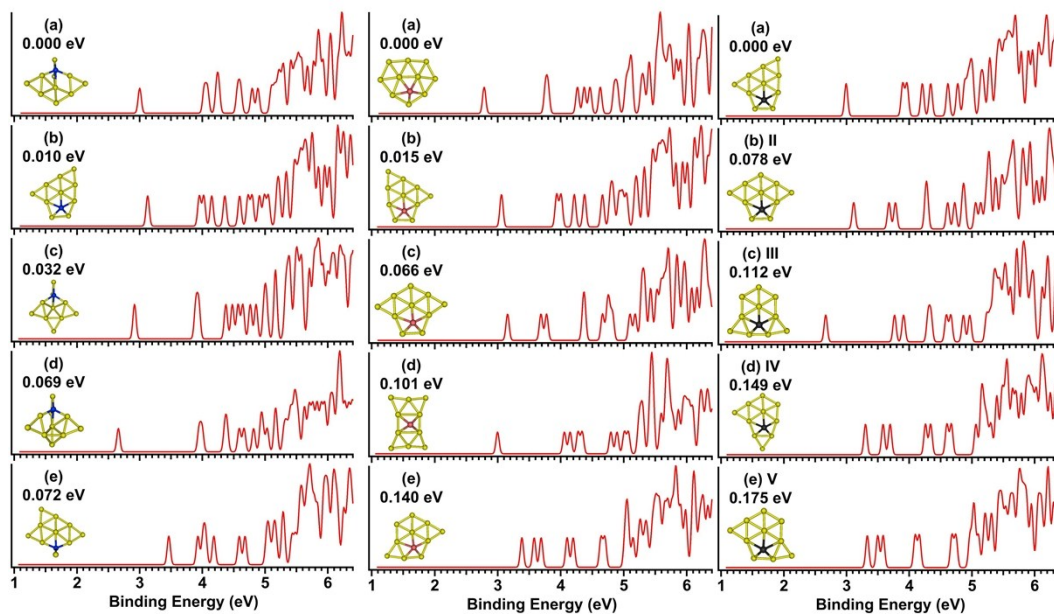

**Fig. S3.** The simulated PES spectra of the top-five lowest-lying isomers of  $\text{Au}_{11}\text{Si}^-$  (left, a-e),  $\text{Au}_{11}\text{Ge}^-$  (middle, a-e), and  $\text{Au}_{11}\text{Sn}^-$  (right, a-e). For each species, the isomers are numbered from the top to bottom (i.e. a-e) as isomer 1 to 5 in accordance with those in Table 3. The relative energies of five low-lying isomers were obtained by PBE0/CRENBL level of theory (NWChem). The insets show the corresponding structures. The dopant atoms are shown in color (Si in blue, Ge in red, and Sn in black).

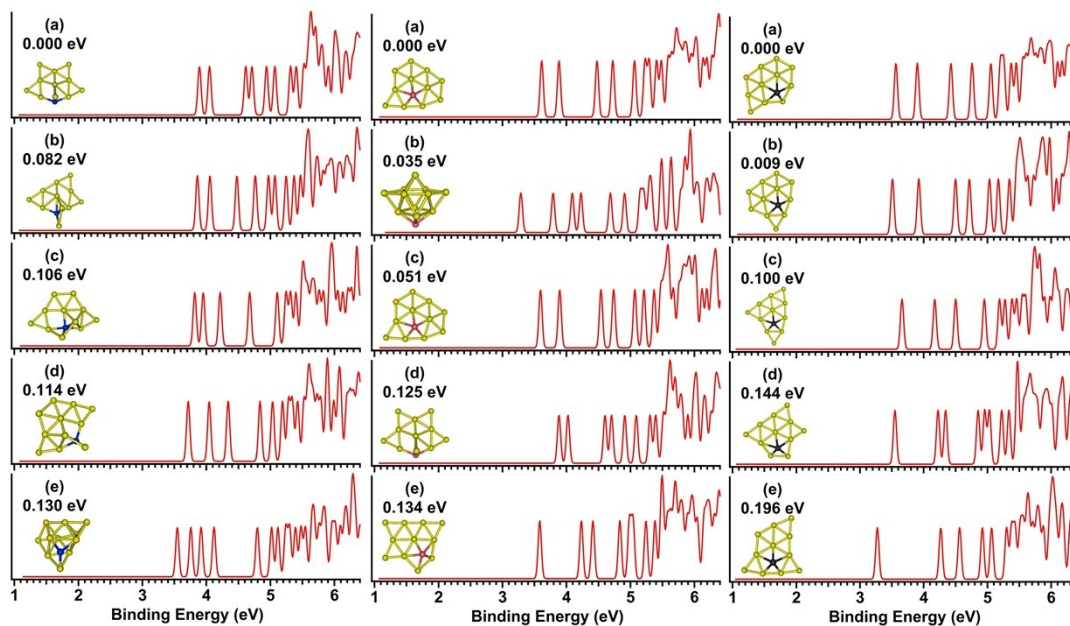

**Fig. S4.** The simulated PES spectra of the top-five lowest-lying isomers of  $\text{Au}_{12}\text{Si}^-$  (left, a-e),  $\text{Au}_{12}\text{Ge}^-$  (middle, a-e), and  $\text{Au}_{12}\text{Sn}^-$  (right, a-e). For each species, the isomers are numbered from the top to bottom (i.e. a-e) as isomer 1 to 5 in accordance with those in Table 4. The relative energies of five low-lying isomers were obtained by PBE0/CRENBL level of theory (NWChem). The insets show the corresponding structures. The dopant atoms are shown in color (Si in blue, Ge in red, and Sn in black).

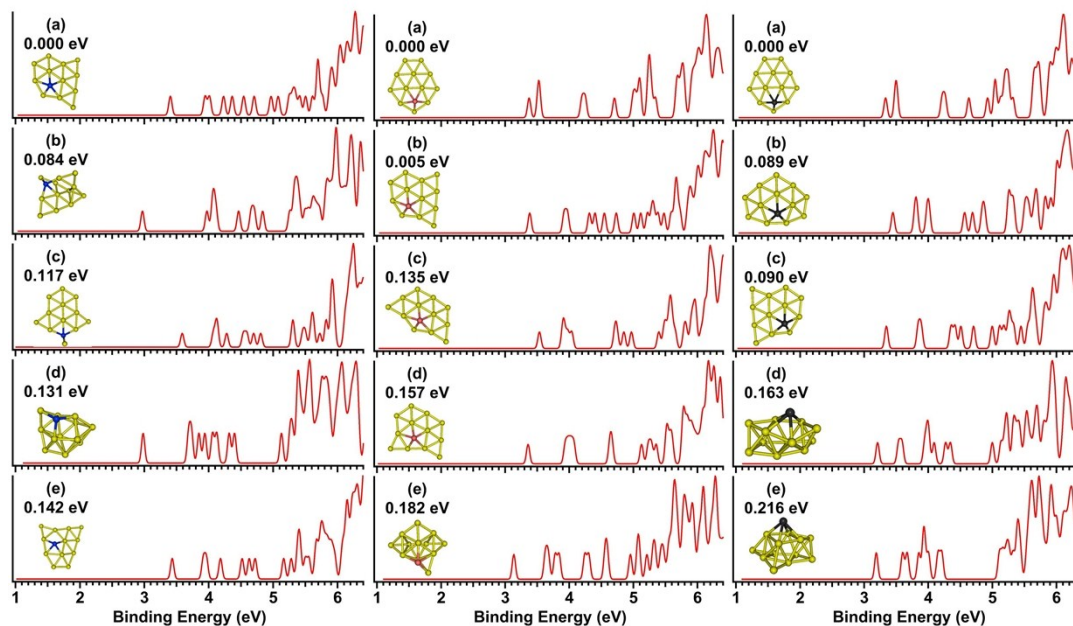

The Cartesian coordinates of the top-five lowest-lying isomers of  $\text{Au}_9\text{Si}^-$

Isomer (a)

|    |               |               |               |
|----|---------------|---------------|---------------|
| Au | 1.1482026583  | -2.0134283776 | -0.9294564826 |
| Au | -1.2748710188 | -1.3680331806 | 0.1876122760  |
| Au | -0.8794368281 | -3.8090996430 | -0.8405471742 |
| Au | 3.7765672237  | -0.0405355599 | 1.1398453946  |
| Au | -1.2470829823 | 1.3936597041  | 0.1974063616  |
| Au | -3.4070641038 | 0.0315295847  | 0.9911960373  |
| Au | -0.8019689300 | 3.8336982229  | -0.8123907867 |
| Au | 1.1885194553  | 1.9974894182  | -0.9155394620 |
| Au | 0.9976035016  | -0.0138655976 | 1.2073394880  |
| Si | 2.5020526403  | -0.0213368581 | -0.9234884800 |

Isomer (b)

|    |               |               |               |
|----|---------------|---------------|---------------|
| Au | -3.1141324756 | 1.3128464208  | 0.7023078208  |
| Au | 2.0010923675  | 1.3990976474  | 0.0726142309  |
| Au | -2.6306256451 | -1.3478586614 | -0.0816308228 |
| Au | -0.7413417866 | 2.4079351042  | -0.3122644371 |
| Au | 1.3685575219  | 3.9972450893  | 0.1988042796  |

|    |               |               |               |
|----|---------------|---------------|---------------|
| Au | -0.0368285934 | -0.1894340657 | -0.8968016638 |
| Au | 2.2499710900  | -1.2336473365 | 0.2082220171  |
| Au | 1.9690772137  | -3.9294445697 | 0.5348875120  |
| Au | -0.3118220665 | -2.7197517372 | 0.0112866907  |
| Si | -2.3016966198 | 0.6587203240  | -1.5209195581 |

Isomer (c)

|    |               |               |               |
|----|---------------|---------------|---------------|
| Au | 0.4932656625  | -2.5515247923 | 0.0522919234  |
| Au | 0.1683898969  | -0.0021022506 | -1.0101690714 |
| Au | -1.6672769289 | 3.9843040008  | 0.3264513428  |
| Au | -1.7493121713 | -3.9499856984 | 0.3225797321  |
| Au | -2.0612705127 | 1.3337532671  | -0.0124632834 |
| Au | -2.0886672216 | -1.2911753962 | -0.0115111296 |
| Au | 2.9323353319  | -1.4792800349 | 0.3161265453  |
| Au | 0.5460289210  | 2.5410804901  | 0.0502844584  |
| Au | 2.9634156584  | 1.4211155950  | 0.3140423105  |
| Si | 2.5121252739  | -0.0258645532 | -1.5825209378 |

Isomer (d)

|    |               |               |               |
|----|---------------|---------------|---------------|
| Au | 0.5127284891  | -2.5309633304 | -0.6573832225 |
| Au | 2.5461488480  | 1.1379259548  | -1.2580012295 |
| Au | -1.7642865562 | 3.9241852116  | 0.0449376618  |
| Au | -1.7536342167 | -3.9440701637 | -0.4734881218 |
| Au | 2.9929824262  | -0.6913968681 | 1.6476910836  |
| Au | 0.4798135284  | -0.0106486596 | 0.6410330514  |
| Au | -1.9235026891 | -1.3723540097 | 0.2784758618  |
| Au | 0.3828904265  | 2.4974874984  | -0.5417617930 |
| Au | -1.9868053104 | 1.2541490579  | 0.4675267931  |
| Si | 2.5258226738  | -1.1892142049 | -0.6744856715 |

Isomer (e)

|    |               |               |               |
|----|---------------|---------------|---------------|
| Au | -0.4630390341 | -0.9724231029 | 2.6253815515  |
| Au | -1.3517285907 | 0.8247518938  | 0.6675973185  |
| Au | 2.1810150549  | -0.9349248087 | 1.5614203736  |
| Au | 2.1547163188  | 3.2216824284  | -1.5835174162 |
| Au | -0.5988734019 | -5.6267579632 | -1.6979086173 |
| Au | -0.3158756945 | 3.0155606847  | -0.6809036611 |
| Au | -0.2117539232 | -3.2926885318 | -0.6514809550 |
| Au | -2.7289335461 | 3.1486500704  | 0.3779273523  |
| Au | 1.4203999359  | 0.8653589610  | -0.4473274154 |
| Si | 0.1146723103  | -1.1310732028 | 0.2376513086  |

The Cartesian coordinates of the top-five lowest-lying isomers of Au<sub>9</sub>Ge<sup>-</sup>

Isomer (a)

|    |                             |               |
|----|-----------------------------|---------------|
| Au | 3.0849737467-1.4173375710   | 0.1528409894  |
| Au | 0.6833751868-2.6756826367   | 0.0581479196  |
| Au | 3.2844330433 1.3907652478   | 0.0238030083  |
| Au | 0.8944226746 0.0616736902   | -0.2815889822 |
| Au | -1.5857586467 -1.0861763206 | -0.1471959693 |
| Au | -1.7856423550 -3.7543082359 | 0.1778628379  |
| Au | 0.9115155053 2.7505554848   | 0.0151930721  |
| Au | -1.7152683912 3.2248901875  | 0.3561172566  |
| Au | -3.3390204670 0.9604373707  | 0.0959716785  |
| Ge | -1.1712553166 1.3236174966  | -1.2746960107 |

#### Isomer (b)

|    |                             |               |
|----|-----------------------------|---------------|
| Au | 1.2764084284-1.4062877677   | -0.1833428111 |
| Au | 1.3307613878 1.3537801570   | -0.1839750697 |
| Au | -0.9577058120 0.0187468098  | -1.1841188502 |
| Au | -1.0856967026 2.0579074993  | 0.8948117022  |
| Au | -3.7180305063 0.0741458369  | -1.2036038504 |
| Au | 0.8206541015-3.8569404468   | 0.7923520582  |
| Au | -1.1667842926 -2.0145534139 | 0.8936093002  |
| Au | 0.9732060652 3.8202480098   | 0.7926872854  |
| Au | 3.4453089209-0.0687793437   | -0.9896365114 |
| Ge | -2.5074909393 0.0491221093  | 0.9691556720  |

#### Isomer (c)

|    |                             |               |
|----|-----------------------------|---------------|
| Au | 2.8450380763-0.6142605358   | -0.0866030292 |
| Au | -1.8781331333 -1.7805351534 | -0.1244303753 |
| Au | -0.9209560816 -4.3291511005 | -0.3566897806 |
| Au | 2.6265149975 2.0677726133   | -0.8407176984 |
| Au | -2.3105887965 0.8320223804  | -0.0588860669 |
| Au | 0.0871554171 2.5240395738   | 0.2532331597  |
| Au | 0.0975671655-0.1504626056   | 0.8622874594  |
| Au | 0.9910910058-2.5638092144   | 0.0516465010  |
| Au | -2.3711224017 3.5011823460  | -0.2457090341 |
| Ge | 2.1218591303 1.2628494093   | 1.4816715333  |

#### Isomer (d)

|    |                             |               |
|----|-----------------------------|---------------|
| Au | -2.0692501327 2.6794621013  | 0.3717281355  |
| Au | 0.6206112515 3.5038426580   | 0.4085615341  |
| Au | 0.6062638710-3.5014740096   | 0.3893914937  |
| Au | 2.3879846011 1.3580929186   | 0.5161834935  |
| Au | -0.1013741105 -1.3112406228 | -0.9526580816 |
| Au | -2.4113204968 0.0070358572  | 0.0083442220  |
| Au | -2.0823522113 -2.6713461857 | 0.3545813065  |
| Au | 2.3852608867-1.3680910245   | 0.5129913143  |

|            |               |               |               |
|------------|---------------|---------------|---------------|
| Au         | -0.0907884648 | 1.3194299690  | -0.9402569434 |
| Ge         | 2.0472040096  | -0.0030061365 | -1.6374786589 |
| Isomer (e) |               |               |               |
| Au         | 2.2345289719  | 3.5284038789  | 0.5239147413  |
| Au         | 0.0960886969  | -0.0255222522 | -1.3595798193 |
| Au         | 1.0716297093  | -4.0332124848 | 0.5408792812  |
| Au         | -0.6475708740 | -1.9974047199 | 0.7565596999  |
| Au         | 2.4266104394  | 0.9698260774  | -0.3183714185 |
| Au         | 2.0298386739  | -1.6553435837 | -0.3093935541 |
| Au         | -0.0181649125 | 2.1056135182  | 0.7444474565  |
| Au         | -2.5093635550 | 0.3879204420  | -1.5816270041 |
| Au         | -4.0545744745 | 0.6235066662  | 0.7426309926  |
| Ge         | -1.6001631940 | 0.2489675346  | 0.8108733268  |

The Cartesian coordinates of the top-five lowest-lying isomers of Au<sub>9</sub>Sn<sup>-</sup>

Isomer (a)

|    |               |               |               |
|----|---------------|---------------|---------------|
| Au | 0.1145809636  | 2.6679055040  | 0.0559762516  |
| Au | 2.4284435564  | 1.1001298820  | 0.0132149127  |
| Au | -2.4171821570 | -1.2425515838 | 0.2251585965  |
| Au | -0.2701034935 | -2.6966696459 | 0.1949496572  |
| Au | -2.2210820612 | 1.5442165390  | 0.1469996792  |
| Au | 2.2452335991  | -1.4856423287 | 0.0765217428  |
| Au | -4.6077594253 | 0.3089272553  | 0.0857711549  |
| Au | 2.5510067698  | 3.7771205435  | -0.1891277314 |
| Au | 1.9763842060  | -4.1585275932 | -0.0096717886 |
| Sn | -0.0586154414 | -0.0467863424 | -1.0593993822 |

Isomer (b)

|    |               |               |               |
|----|---------------|---------------|---------------|
| Au | 1.6890187220  | 3.2648765306  | -0.4429094376 |
| Au | -0.9355946050 | 2.7138024533  | -0.0934423229 |
| Au | -3.3066363480 | 1.3526891260  | -0.1182435131 |
| Au | -0.7232847799 | -2.7140172417 | -0.0173136285 |
| Au | 1.7263189643  | -3.8260548365 | -0.2050826552 |
| Au | 1.5655173063  | -1.1484780922 | 0.1179082787  |
| Au | -0.9274663048 | 0.0235656448  | 0.3139340558  |
| Au | 3.2693420227  | 0.9247456371  | -0.3086227507 |
| Au | -3.1206326813 | -1.4526111136 | -0.1721925897 |
| Sn | 1.2302042290  | 1.3678052662  | 1.4947989891  |

Isomer (c)

|    |               |               |               |
|----|---------------|---------------|---------------|
| Au | -3.0216289101 | 0.8751888433  | 0.0806574441  |
| Au | -1.4148776172 | -1.3192427812 | -0.2010110990 |
| Au | 2.6392358564  | 1.2862399048  | -0.0237597536 |
| Au | 0.9254817326  | 3.4465434768  | 0.0510921279  |

|    |               |               |               |
|----|---------------|---------------|---------------|
| Au | -1.7901684062 | 3.2941541830  | 0.3446913081  |
| Au | 0.7930831198  | -2.8912580173 | 0.2402421140  |
| Au | -1.7441885085 | -3.9460298062 | 0.1315914623  |
| Au | -0.2671274577 | 1.0705434855  | -0.2750014895 |
| Au | 2.9950357677  | -1.3422408684 | 0.6087073848  |
| Sn | 1.4067742834  | -0.7485798047 | -1.5179406387 |

Isomer (d)

|    |               |               |               |
|----|---------------|---------------|---------------|
| Au | 0.1459093773  | 2.4957290716  | 0.2529217859  |
| Au | 0.7851371251  | -2.6480573765 | 0.0086459355  |
| Au | 2.6382143517  | 1.9108028561  | -0.9223613613 |
| Au | -2.2718788717 | 3.5826996547  | -0.2513598392 |
| Au | -2.3246883491 | 0.9119778366  | -0.0985400045 |
| Au | -2.0198545400 | -1.7154937481 | -0.1846076386 |
| Au | 2.7312933616  | -0.8112046372 | -0.2633464821 |
| Au | -1.2152570809 | -4.3133917616 | -0.4126818239 |
| Au | 0.0231485701  | -0.1896540611 | 0.8604061060  |
| Sn | 2.2950185654  | 1.1174711174  | 1.6318184324  |

Isomer (e)

|    |               |               |               |
|----|---------------|---------------|---------------|
| Au | -2.3118392262 | 2.6460278846  | 0.1938449312  |
| Au | -0.0013486552 | 1.6364183619  | -0.6822929047 |
| Au | 0.0035545238  | -4.9017062190 | 0.6506342554  |
| Au | 2.1449561660  | -0.0963240182 | -0.0940243908 |
| Au | -2.1452711331 | -0.0985642604 | -0.0899088367 |
| Au | 2.3079763899  | 2.6489500146  | 0.1923283972  |
| Au | -1.4234173336 | -2.6589441152 | 0.1002733379  |
| Au | -0.0027936815 | 4.0878396196  | 0.6741061690  |
| Au | 1.4280719931  | -2.6579514160 | 0.0969791028  |
| Sn | -0.0012971170 | -0.9701576102 | -1.6700384390 |

The Cartesian coordinates of the top-five lowest-lying isomers of Au<sub>10</sub>Si<sup>-</sup>

Isomer (a)

|    |               |               |               |
|----|---------------|---------------|---------------|
| Au | -2.1000685036 | -0.0052837335 | -1.8253345833 |
| Au | 0.5827338796  | 4.4258965098  | 0.8839852182  |
| Au | -0.8316051239 | 2.1551786688  | 0.7763209868  |
| Au | 0.4073600758  | -0.0058993168 | -0.8920355708 |
| Au | 1.8451033612  | 2.3164562559  | -0.1767669887 |
| Au | -4.2064042235 | 0.0065731796  | 0.0166178386  |
| Au | 3.1024921925  | -0.0078753945 | -0.6846754905 |
| Au | 1.8421010169  | -2.3226938241 | -0.1431832211 |
| Au | -0.8366829778 | -2.1364491492 | 0.8051753097  |
| Au | 0.5643199930  | -4.4143060956 | 0.9346266572  |
| Si | -1.8708291227 | 0.0099745353  | 0.6605965112  |



Isomer (b)

|    |               |               |               |
|----|---------------|---------------|---------------|
| Au | -2.7700941156 | -0.4003591081 | 0.0486016082  |
| Au | -3.3227646855 | 2.2344639730  | -0.2932015828 |
| Au | -1.0510386205 | 3.8968032473  | -0.1151599749 |
| Au | 0.1586405210  | -4.8849741441 | -0.1332459823 |
| Au | 3.6931197114  | 2.3444399854  | -0.1535159137 |
| Au | 1.0371817267  | 2.2029581690  | 0.1133989855  |
| Au | -1.4239133878 | -2.7208620948 | 0.0019616061  |
| Au | 2.6267114680  | -0.1254365710 | -0.0309978551 |
| Au | -0.0791761160 | -0.3235272118 | 0.2975981217  |
| Au | 1.4625278663  | -2.5256932480 | -0.0627093896 |
| Si | -1.3634790494 | 1.7380037684  | 1.1663197681  |

Isomer (c)

|    |               |               |               |
|----|---------------|---------------|---------------|
| Au | 3.7786022311  | -1.3417901943 | 0.6923148596  |
| Au | 0.2606242304  | 4.5846831230  | 0.5747055519  |
| Au | -0.0110520783 | 0.2881434298  | -1.3547431836 |
| Au | 2.0568545332  | 0.7206318471  | 0.6946629178  |
| Au | -1.9275426405 | 0.9327991738  | 0.7832661437  |
| Au | -3.8573380394 | -0.9343368949 | 0.8641974623  |
| Au | 1.2805073070  | -1.8620883102 | -0.1106414764 |
| Au | -0.2242379096 | -4.0398483252 | -0.5734853598 |
| Au | 0.1243675565  | 2.9438561196  | -1.7303288930 |
| Au | -1.4673149550 | -1.7160412444 | -0.0492343589 |
| Si | 0.1326629658  | 2.1527337815  | 0.6265458768  |

Isomer (d)

|    |               |               |               |
|----|---------------|---------------|---------------|
| Au | 2.5106250452  | -3.5532443502 | 0.7924012930  |
| Au | 1.6669241255  | -2.2584061252 | -1.5365766654 |
| Au | 0.1406318667  | -0.1117031646 | -1.3519493580 |
| Au | -3.8701095373 | -0.9761313775 | 0.9766832914  |
| Au | 0.0116008341  | 2.3791204183  | -0.0630561281 |
| Au | 1.9684368888  | 0.6403511956  | 1.0108471133  |
| Au | -1.2898116083 | 1.9473799372  | -2.4860668073 |
| Au | 2.2068017675  | 3.3162945417  | 1.1410406961  |
| Au | -1.2663750906 | -1.6487293225 | 0.9163154755  |
| Au | -2.2110309006 | 0.8082088522  | -0.1206595236 |
| Si | 1.1088855314  | -1.5690473292 | 0.7939351862  |

Isomer (e)

|    |               |               |               |
|----|---------------|---------------|---------------|
| Au | -1.6558354726 | -3.9345589130 | 0.8711645950  |
| Au | -2.1164445453 | -1.3235286221 | 0.5569371478  |
| Au | -3.8388676104 | 1.4194022620  | -1.6067283965 |

|    |               |               |               |
|----|---------------|---------------|---------------|
| Au | 2.9563899928  | -3.1510564665 | -0.4935044197 |
| Au | 1.2321996011  | 4.5511239020  | 0.7521009750  |
| Au | -0.8339974861 | 2.8545320047  | 0.5684325191  |
| Au | 0.4345345149  | -2.4900649334 | 0.0461764703  |
| Au | 1.9166768256  | 2.0697155864  | -0.0075051509 |
| Au | -0.0749408396 | 0.2738408337  | -0.3654078505 |
| Au | 2.5103849001  | -0.5101914803 | -0.3884970841 |
| Si | -2.4216702311 | 1.0601877527  | 0.2479329032  |

The Cartesian coordinates of the top-five lowest-lying isomers of Au10Ge<sup>-</sup>

Isomer (a)

|    |               |               |               |
|----|---------------|---------------|---------------|
| Au | -2.5662327108 | 2.7481740803  | -0.1535476785 |
| Au | -2.5950272225 | -2.7116095844 | -0.1732209722 |
| Au | -0.3342268535 | -1.3304271045 | 0.3387557345  |
| Au | 2.1753075322  | -2.3250171957 | -0.0120980801 |
| Au | -0.0088407500 | 3.9771420862  | -0.1839361073 |
| Au | -0.3205973617 | 1.3348387552  | 0.3411061561  |
| Au | 2.2012046880  | 2.2941488578  | -0.0204510014 |
| Au | 3.5932819066  | -0.0237042710 | -0.4046371737 |
| Au | -2.7371512804 | 0.0178814467  | 0.0073545502  |
| Au | -0.0565958121 | -3.9780398669 | -0.1829495392 |
| Ge | 1.7537677080  | -0.0099353863 | 1.3409167429  |

Isomer (b)

|    |               |               |               |
|----|---------------|---------------|---------------|
| Au | 0.0551557267  | 0.3326799816  | -0.2863637099 |
| Au | 2.7379008196  | -0.0150079825 | -0.1526511135 |
| Au | -1.1368236557 | 2.7506407233  | -0.0233421834 |
| Au | 1.7553358629  | 2.4913198430  | -0.2012806376 |
| Au | 2.9813261369  | -2.6747844519 | 0.3326339764  |
| Au | -1.3863373215 | -2.0073589417 | 0.0245134246  |
| Au | 0.4663092059  | -3.9524320087 | 0.3311091066  |
| Au | -2.6338081305 | 0.5400591827  | 0.0914741567  |
| Au | -4.0285307466 | -1.7444206492 | 0.3567817913  |
| Au | 0.5261857004  | 4.8751098951  | -0.1037298097 |
| Ge | 1.0421636075  | -1.9398739551 | -1.1698894756 |

Isomer (c)

|    |               |               |               |
|----|---------------|---------------|---------------|
| Au | -0.3916577772 | 2.5221387806  | -0.1043910655 |
| Au | -1.2109583641 | -2.1203675817 | -0.1989758220 |
| Au | 2.3735041702  | 2.0497999947  | 0.0815991022  |
| Au | 3.2431090622  | -0.5188255635 | 0.1209162258  |
| Au | 1.5469877496  | -2.6309627939 | -0.0116105946 |
| Au | -0.2343132446 | -4.6288914249 | 0.0183827705  |

|    |                             |               |
|----|-----------------------------|---------------|
| Au | 0.5878485755-0.0429377581   | -0.2297087146 |
| Au | -3.0028647607 1.9860444200  | 0.2917230258  |
| Au | -3.4844588331 -0.7397571009 | 0.2346940077  |
| Au | 1.3838723037 4.5342967530   | 0.1999809996  |
| Ge | -1.7313317567 0.3883677040  | -1.2860123177 |

Isomer (d)

|    |                             |               |
|----|-----------------------------|---------------|
| Au | -2.5264426080 -3.8685340081 | 0.3004139336  |
| Au | 2.6967069087-3.7491835323   | 0.3102798135  |
| Au | -2.6987116154 3.7511759780  | 0.3017482508  |
| Au | -1.6451015014 1.2992550632  | -0.2643618591 |
| Au | -1.5872782406 -1.3692431503 | -0.2623440100 |
| Au | 2.5245915540 3.8696557487   | 0.3089678941  |
| Au | 1.5859393062 1.3718698287   | -0.2585727612 |
| Au | -0.0809269355 3.5509395439  | 0.1705753892  |
| Au | 0.0793394210-3.5471906669   | 0.1683363473  |
| Au | 1.6480091295-1.2968355214   | -0.2593695512 |
| Ge | 0.0029606212-0.0009487903   | -1.7513617803 |

Isomer (e)

|    |                             |               |
|----|-----------------------------|---------------|
| Au | 3.1998077114-0.8795899991   | 0.0725235625  |
| Au | -0.0581877056 -4.8411047554 | 0.2209079722  |
| Au | 0.9193971408-2.3377261433   | -0.0935187500 |
| Au | -3.1180097425 -0.4917858622 | 0.3698713015  |
| Au | -1.6701542828 4.4028037139  | 0.1688550888  |
| Au | 3.0681427171 1.9146151286   | 0.1587679943  |
| Au | 0.7183963803 3.1927663313   | 0.0600648832  |
| Au | -1.6071005360 1.7249806744  | -0.2454590012 |
| Au | 0.8349989050 0.4019679069   | -0.2310124323 |
| Au | -1.8141399577 -2.8331466283 | -0.0242929845 |
| Ge | -1.2145194910 -0.6617454954 | -1.3180526302 |

The Cartesian coordinates of the top-five lowest-lying isomers of Au<sub>10</sub>Sn<sup>-</sup>

Isomer (a)

|    |                             |               |
|----|-----------------------------|---------------|
| Au | 0.2446732923 4.9683807312   | -0.0319739428 |
| Au | 1.1193076401-2.1454086730   | 0.0641783947  |
| Au | -2.6958824144 0.4756333154  | -0.0749698972 |
| Au | -3.4139690579 -2.1152863152 | 0.3584878633  |
| Au | -1.0564153661 -3.7092511513 | 0.5007599314  |
| Au | 2.7146724279 0.2020031361   | 0.0822457862  |
| Au | 0.0185454692 0.3979480350   | -0.2482231833 |
| Au | -1.3244537569 2.7936137306  | -0.1275528492 |
| Au | 1.5722968246 2.6172769905   | 0.0029996233  |

Au 3.7869870506-2.2497690566 0.3415535286  
Sn -1.3477514495 -1.7725492554 -1.4234702902

Isomer (b)

Au -0.8255787944 -4.6274242722 -0.1916773016  
Au -2.1131985040 -2.2860963588 -0.0422836867  
Au -3.3264573248 0.1360565194 -0.1249860127  
Au -0.6289849589 0.0288622952 0.2855455219  
Au 0.6903072184-2.4008881377 0.1059609153  
Au 3.2061898983-1.5262113618 -0.3819724367  
Au 3.3220937640 1.2658172286 -0.3925912670  
Au 0.8842187668 2.3416477957 0.0832023184  
Au -1.9205314478 2.4534139570 -0.0574743900  
Au -0.4492122472 4.6809122021 -0.2327406831  
Sn 1.8522597346 -0.0650853158 1.5219844452

Isomer (c)

Au -3.8455356487 -1.1272332467 -0.4041092642  
Au 0.9572123134 4.4453327032 -0.3002069290  
Au 2.9303672278-0.5264741950 -0.2925798080  
Au -0.5528928092 2.2738502665 0.2067869853  
Au -1.2362690374 -0.3610892550 0.2437450806  
Au 0.7616836208-2.2096076690 0.2121682839  
Au 3.2050224758-3.2259492099 -0.2851975763  
Au -1.8731906005 -2.9739405019 -0.0519011549  
Au -3.1831738119 1.4931573428 -0.0575493053  
Au 2.1810949983 2.0244737718 -0.2980860114  
Sn 1.0782296198 0.3193903742 1.6378430821

Isomer (d)

Au -0.6834240917 -4.9615256185 -0.4793227948  
Au -1.3602218491 2.9555877171 -0.1534669075  
Au 1.2764334945-3.0929654280 -0.1533731569  
Au -3.8525656264 2.0330476697 -0.0376523057  
Au -1.5022747601 -2.4245867160 -0.1181173431  
Au 0.7206276671 1.2206609275 0.2705666936  
Au 3.3374788885 1.8379991659 -0.0668264307  
Au 2.5863753030-0.7904356467 0.0082110686  
Au -1.8722300056 0.1889510098 0.1614175093  
Au 1.1902669029 3.7742713667 -0.4532033296  
Sn 0.2520854676 -1.1778038999 1.6317235261

Isomer (e)

Au -3.2648581692 0.8144431353 -0.0223365747  
Au 3.1580193445 0.5208507428 -0.3111309057

|    |               |               |               |
|----|---------------|---------------|---------------|
| Au | -0.8817715079 | -0.4453555330 | 0.2727284542  |
| Au | 1.7657768595  | 2.8305145393  | -0.1800606334 |
| Au | -0.9740946389 | 2.2847094831  | 0.0539953154  |
| Au | -0.7023972522 | -3.2137271889 | -0.0944909484 |
| Au | 1.7192702650  | -4.3561731080 | -0.3380887134 |
| Au | -3.0896240397 | -1.9805633838 | -0.1541045932 |
| Au | -0.0554670516 | 4.7855064397  | -0.4032489523 |
| Au | 1.5892866333  | -1.6966619595 | 0.1972813914  |
| Sn | 1.2117184326  | 0.7508464604  | 1.6144745531  |

The Cartesian coordinates of the top-five lowest-lying isomers of Au<sub>11</sub>Si<sup>-</sup>

Isomer (a)

|    |               |               |               |
|----|---------------|---------------|---------------|
| Au | -2.0374942967 | -0.0006819643 | -0.2545845306 |
| Au | 0.7071737237  | -4.4521034094 | 1.1048209964  |
| Au | -0.6377686371 | 2.3224676988  | 0.1670520525  |
| Au | 2.0280589519  | 2.1494044550  | 0.7046981571  |
| Au | 2.0296665537  | -2.1488339358 | 0.7040109826  |
| Au | -3.2473661294 | -2.3866766685 | -0.3709519262 |
| Au | -0.6362725295 | -2.3234296362 | 0.1663104251  |
| Au | 0.6709595079  | -0.0002513345 | -0.8630775762 |
| Au | -3.2501808722 | 2.3840986298  | -0.3645988739 |
| Au | 0.7051563097  | 4.4529807789  | 1.1023575034  |
| Au | 3.1694865708  | 0.0026397488  | -2.1374968940 |
| Si | 2.9783175618  | 0.0007296447  | 0.2747724465  |

Isomer (b)

|    |               |               |               |
|----|---------------|---------------|---------------|
| Au | -3.6104469708 | -2.8686694776 | -0.2622604232 |
| Au | 1.9172854046  | 4.1060395051  | -0.6848736948 |
| Au | 0.4252961095  | -2.8069123231 | 0.6555460731  |
| Au | 2.3153519606  | 1.4608382383  | -0.4512231463 |
| Au | 2.9571119560  | -3.6463655888 | 0.8940008213  |
| Au | 0.2156768586  | -0.2149770209 | -0.8424482477 |
| Au | 2.6405895287  | -1.1171537669 | 0.0555256940  |
| Au | -2.0216931486 | -1.2275987459 | -1.9061518397 |
| Au | -0.1372857507 | 2.6322198471  | 0.1775880836  |
| Au | -2.4038157067 | 3.2778590311  | 1.3933383348  |
| Au | -2.0284993969 | 0.6774439498  | 0.9164536158  |
| Si | -1.6660547788 | -1.6562062090 | 0.5226099920  |

Isomer (c)

|    |               |               |               |
|----|---------------|---------------|---------------|
| Au | -3.1070324228 | 1.4323290061  | 0.5629142024  |
| Au | -1.0946193789 | -2.7858905544 | -0.3129279025 |
| Au | 0.7246116939  | 4.6923724110  | -1.0281732182 |

|    |               |               |               |
|----|---------------|---------------|---------------|
| Au | 1.7723713295  | 2.2446977232  | -1.1284397396 |
| Au | -3.3009459944 | -1.2827623438 | 0.0563570251  |
| Au | 1.6353315273  | -2.4863584469 | -0.4391383277 |
| Au | 3.0376191868  | -0.7224922286 | 1.2813345533  |
| Au | 0.5651013623  | -4.9152389877 | -0.6175380255 |
| Au | -0.8521364806 | -0.1018037076 | 0.0922776216  |
| Au | 1.1227315155  | 1.2144853896  | 1.6118089556  |
| Au | -0.7746185576 | 2.6995334673  | 0.0650019558  |
| Si | 1.5580423287  | -0.0666252871 | -0.5744618360 |

Isomer (d)

|    |               |               |               |
|----|---------------|---------------|---------------|
| Au | 1.4022465859  | 4.4766225656  | -0.9341538723 |
| Au | -3.0994980897 | 1.8503052303  | 0.1653442333  |
| Au | 3.8190918924  | -0.6884233827 | 1.3861519689  |
| Au | 1.3431713986  | -2.4591474790 | -1.1592036240 |
| Au | -0.8508539542 | 3.2119708373  | -0.2779708077 |
| Au | -1.1156543099 | -2.2811237874 | 0.0907345369  |
| Au | -0.4847475343 | -4.3990279438 | -1.4628703668 |
| Au | -3.2146078131 | -0.8490432159 | 0.9526739928  |
| Au | -0.8180326858 | 0.4790945952  | 0.4143421094  |
| Au | 1.0908281905  | -1.0825750364 | 1.4782145122  |
| Au | 1.5444685029  | 1.8088712517  | -0.5453320614 |
| Si | 2.4028413379  | -0.3965271517 | -0.5734821798 |

Isomer (e)

|    |               |               |               |
|----|---------------|---------------|---------------|
| Au | 1.4235419775  | 1.5697965524  | -0.8407357423 |
| Au | 2.7855192169  | -0.7521585474 | -0.8860614495 |
| Au | -1.6169168435 | 0.0341225141  | 1.2012114320  |
| Au | 1.0462549949  | -0.7247973364 | 1.3326213810  |
| Au | -0.9778657924 | -2.5349236288 | 0.1794431132  |
| Au | 0.1216115774  | -0.7457148932 | -1.6518097435 |
| Au | -3.4951067214 | -1.4245140057 | -0.1917213770 |
| Au | 0.3540618316  | 3.9508628035  | 0.0067768983  |
| Au | 0.4026461635  | 1.8287889094  | 1.7761065870  |
| Au | 1.6773025900  | -3.1087218693 | 0.1604185517  |
| Au | -1.4097018061 | 2.0072055903  | -0.8241493062 |
| Si | -2.2518933524 | -0.0873080774 | -1.7883889070 |

The Cartesian coordinates of the top-five lowest-lying isomers of Au11Ge<sup>-</sup>

Isomer (a)

|    |               |               |               |
|----|---------------|---------------|---------------|
| Au | -0.8492780736 | 4.9793478585  | -0.4081157683 |
| Au | -0.8882670583 | -4.3225454266 | -0.3248976254 |
| Au | -1.4276351009 | 2.3739346480  | 0.1915030357  |

|    |               |               |               |
|----|---------------|---------------|---------------|
| Au | 1.2009797453  | 3.3112318727  | -0.0990334509 |
| Au | 0.7424834416  | 0.6769852186  | 0.4662528054  |
| Au | 3.2534350128  | 1.5514955298  | -0.0872952913 |
| Au | 1.8117370224  | -3.7621545587 | -0.3705938738 |
| Au | 0.0272462007  | -1.8929817889 | 0.4394999809  |
| Au | -2.6331859068 | -2.1580389709 | 0.0240704677  |
| Au | 2.6909512407  | -1.2038939064 | 0.0092716979  |
| Au | -3.2974548608 | 0.4488409958  | -0.4027669710 |
| Ge | -1.5984606708 | -0.0129839483 | 1.4362313622  |

Isomer (b)

|    |               |               |               |
|----|---------------|---------------|---------------|
| Au | -0.7617905057 | -1.3497556709 | 1.4877043277  |
| Au | -2.7689757893 | -0.0076857452 | 0.1455537486  |
| Au | -0.7662533649 | 1.3412944175  | 1.4883000505  |
| Au | -0.9163249181 | -1.3390037706 | -1.4462396154 |
| Au | 1.6842477052  | -0.0022529606 | 1.9507975326  |
| Au | -0.9240832548 | 1.3414738085  | -1.4424105063 |
| Au | -0.7149516334 | -3.6620548272 | 0.0003478980  |
| Au | -0.7233284646 | 3.6604800341  | 0.0111711435  |
| Au | 1.5061375712  | 0.0094527854  | -2.0313501190 |
| Au | 1.5622682491  | 2.0657392788  | -0.0540223786 |
| Au | 1.5666244912  | -2.0601038400 | -0.0656009595 |
| Ge | 3.1513073708  | 0.0045443498  | -0.1019641119 |

Isomer (c)

|    |               |               |               |
|----|---------------|---------------|---------------|
| Au | 1.3870228605  | -4.7626926368 | -0.4499002978 |
| Au | -0.4027409549 | -2.8169204149 | 0.0654196422  |
| Au | 2.7371635789  | 3.1025603562  | -0.0463700528 |
| Au | -1.2372608818 | -0.2177736882 | 0.3807591339  |
| Au | -1.9434918829 | 2.4656039029  | -0.1905180464 |
| Au | 2.2978290143  | -2.2371549512 | -0.1609860255 |
| Au | 2.9248930284  | 0.3438975348  | -0.0839525389 |
| Au | -3.0519659079 | -2.1125362693 | -0.0203487704 |
| Au | 0.5700379731  | 1.7165301360  | 0.5556266690  |
| Au | -3.8498834151 | 0.5411858565  | -0.1503962218 |
| Au | 0.1407168503  | 4.2170216159  | -0.4899385679 |
| Ge | 1.0752177141  | -0.6450166384 | 1.4913964205  |

Isomer (d)

|    |               |               |               |
|----|---------------|---------------|---------------|
| Au | 2.0835887541  | -0.0022196477 | 0.2274896052  |
| Au | -1.9644200960 | 2.1927938775  | -0.6851478808 |
| Au | -1.9682983404 | -2.1906884046 | -0.6795698689 |
| Au | -0.6342892092 | 4.5025302908  | -1.0151007978 |
| Au | -0.6441240329 | -4.5037836576 | -1.0078595576 |

|    |               |               |               |
|----|---------------|---------------|---------------|
| Au | -0.6319101420 | -0.0001138147 | 0.8045877334  |
| Au | 0.7013123408  | 2.3326107521  | -0.1666324343 |
| Au | -3.0859173778 | 0.0084056220  | 2.1238454173  |
| Au | 3.3137653793  | 2.3758860043  | 0.3549971117  |
| Au | 3.3129284874  | -2.3811446056 | 0.3460371666  |
| Au | 0.6985781368  | -2.3352793074 | -0.1666269795 |
| Ge | -2.9888050396 | 0.0024471812  | -0.3546704194 |

Isomer (e)

|    |               |               |               |
|----|---------------|---------------|---------------|
| Au | 2.1612638500  | -4.4205962682 | 0.0022958150  |
| Au | 3.0534034547  | 3.5276116666  | -0.1121354972 |
| Au | -1.8968659042 | 1.3923278489  | 0.2483827306  |
| Au | -2.5829322309 | -2.4659186231 | -0.6697970797 |
| Au | 2.5065877046  | -1.7537956357 | -0.0318644718 |
| Au | -4.0805878015 | -0.2673218113 | 0.0539287027  |
| Au | -1.8213321073 | 4.0247506004  | -0.2301028957 |
| Au | 0.2768942347  | -0.2068852487 | 0.2742418321  |
| Au | 0.5206416918  | 2.7137743683  | -0.0378577756 |
| Au | -0.0852924841 | -2.9995176394 | 0.0367828047  |
| Au | 2.7354339218  | 0.8722512953  | -0.0782252299 |
| Ge | -1.9292798588 | -1.0374698314 | 1.3264201496  |

The Cartesian coordinates of the top-five lowest-lying isomers of Au<sub>1</sub>1Sn<sup>-</sup>

Isomer (a)

|    |               |               |               |
|----|---------------|---------------|---------------|
| Au | 1.8512141002  | -3.7367502612 | -0.4543511775 |
| Au | 0.0582499188  | -1.9177031966 | 0.4935763911  |
| Au | 3.2883273221  | 1.5266719844  | -0.0882678812 |
| Au | 0.7663497453  | 0.6743012146  | 0.5519275288  |
| Au | -0.7520703384 | 4.9894933984  | -0.5399090644 |
| Au | -3.2694657710 | 0.4610887286  | -0.5074339668 |
| Au | 1.2422114949  | 3.2845977559  | -0.1309605404 |
| Au | -2.5892589198 | -2.1589362737 | -0.1110811293 |
| Au | 2.7130476022  | -1.2041747833 | 0.0465989516  |
| Au | -1.3992108393 | 2.3956003695  | 0.1238731803  |
| Au | -0.8344815886 | -4.3130417356 | -0.4365082221 |
| Sn | -1.7154671351 | -0.0046986019 | 1.6862981414  |

Isomer (b)

|    |               |               |               |
|----|---------------|---------------|---------------|
| Au | -0.5981575385 | 1.7260138818  | -0.5834291125 |
| Au | -2.2595788039 | -2.3127823347 | 0.2629439544  |
| Au | -2.7956501548 | 3.0202125562  | 0.1297635475  |
| Au | 3.8730999870  | 0.6771736976  | 0.1884032135  |
| Au | -2.9161048521 | 0.2679423134  | 0.1239772190  |



|    |               |               |               |
|----|---------------|---------------|---------------|
| Au | 1.8982971460  | 2.5405376765  | 0.1935939673  |
| Au | 0.4849899483  | -2.7473686234 | -0.0160794916 |
| Au | 1.2982105034  | -0.1431945851 | -0.4401860075 |
| Au | -1.1859022759 | -4.7694988909 | 0.6039482117  |
| Au | -0.2312166713 | 4.1984021724  | 0.5927035533  |
| Au | 3.1290784108  | -1.9986230055 | 0.0408990682  |
| Sn | -1.1086706347 | -0.7519506129 | -1.7485832259 |

Isomer (c)

|    |               |               |               |
|----|---------------|---------------|---------------|
| Au | -1.8800811468 | -4.9685183324 | -0.2615031953 |
| Au | -2.3523598019 | -2.3483564563 | 0.0440473618  |
| Au | 0.6811170525  | 3.1987036200  | -0.2801038302 |
| Au | -2.1388525096 | 3.0004972571  | -0.0227445510 |
| Au | 2.0513416047  | 0.9609025328  | 0.0245334860  |
| Au | -2.5258682378 | 0.3606566679  | 0.0598543580  |
| Au | 0.4022190584  | -3.5729181827 | -0.1590449481 |
| Au | -0.0862174797 | -0.9091387412 | 0.0611316832  |
| Au | -0.8349539830 | 5.3954374150  | -0.4177843991 |
| Au | 2.4590846114  | -1.8677647294 | -0.0503873654 |
| Au | 4.5018181707  | -0.1509420866 | 0.0239122145  |
| Sn | -0.4370010130 | 1.4357401264  | 1.5597886577  |

Isomer (d)

|    |               |               |               |
|----|---------------|---------------|---------------|
| Au | 2.6692733696  | 1.5016882338  | -0.0949781614 |
| Au | 0.1709871433  | 2.9724718380  | -0.0606290650 |
| Au | 0.3674756354  | -2.7998057730 | -0.0375563832 |
| Au | -2.4287778676 | 2.8019978704  | -0.6025833831 |
| Au | -2.0533012788 | -3.9089285614 | -0.3754661102 |
| Au | 0.3346602406  | 0.1429329007  | 0.2679083155  |
| Au | 2.8388716002  | -3.8014362218 | 0.0099351422  |
| Au | -1.9633630685 | -1.2840289006 | 0.1911879640  |
| Au | -4.0045349255 | 0.5600301588  | -0.1012451312 |
| Au | 2.7094011437  | -1.1351516982 | -0.0569952618 |
| Au | 2.5488416813  | 4.1775801089  | -0.1161659825 |
| Sn | -1.8683935947 | 1.2363525674  | 1.5539381953  |

Isomer (e)

|    |               |               |               |
|----|---------------|---------------|---------------|
| Au | 0.1361733991  | -5.3589468693 | 0.0491188558  |
| Au | -3.1510934133 | -1.1286186215 | 0.1929186135  |
| Au | 2.2393810341  | 2.4166125667  | 0.3577043310  |
| Au | -1.6752725093 | -3.3333264575 | 0.2361459888  |
| Au | -2.6811736211 | 4.2218820251  | 0.0007409794  |
| Au | -0.5355432566 | -0.6330058162 | -0.0837548612 |
| Au | 4.4730514144  | 0.9593133363  | 0.1716006459  |

|    |               |               |               |
|----|---------------|---------------|---------------|
| Au | -0.1112525699 | 3.5929712854  | 0.3218815381  |
| Au | -2.1187786951 | 1.5511704658  | -0.0512762869 |
| Au | 2.1818832552  | -0.4132526867 | -0.0957222540 |
| Au | 1.0238702633  | -2.8434766041 | -0.1545916339 |
| Sn | 0.3481094202  | 1.5369071751  | -1.5046152255 |

The Cartesian coordinates of the top-five lowest-lying isomers of Au<sub>12</sub>Si<sup>-</sup>

Isomer (a)

|    |               |               |               |
|----|---------------|---------------|---------------|
| Au | -0.2838734727 | -0.7243443514 | -0.2875366903 |
| Au | 3.5551752572  | -0.4792933088 | 0.6967227282  |
| Au | 0.4342582431  | 1.8347503444  | -0.3781794998 |
| Au | -1.2791743465 | 3.8617490178  | 0.0789756831  |
| Au | 1.2668514336  | -5.0753940026 | 0.0139823021  |
| Au | -4.7007752359 | 0.2804156587  | 0.2302137999  |
| Au | 1.4367698863  | 4.3324811179  | -0.0037812126 |
| Au | -2.8040888962 | -1.6124021083 | 0.1246053359  |
| Au | 3.1034062108  | 2.1295176139  | 0.0482808890  |
| Au | -2.2418563092 | 1.2781163206  | -0.0304563411 |
| Au | 1.9342192540  | -2.4940569880 | -0.2186604378 |
| Au | -0.8007498831 | -3.3620836408 | 0.0284108672  |
| Si | 2.0136926443  | -0.0580828932 | -1.1944771389 |

Isomer (b)

|    |               |               |               |
|----|---------------|---------------|---------------|
| Au | 0.2227480806  | -3.1271956437 | -0.3839131515 |
| Au | 2.0987984216  | 0.3333119884  | 1.8146371779  |
| Au | -2.5064292719 | 0.7597172826  | 0.4659081139  |
| Au | -2.0851720654 | 3.4323587818  | 0.9161068434  |
| Au | -0.0699556078 | 1.8777977789  | 2.0020488307  |
| Au | -0.0843119093 | -0.4747764407 | 0.4187266302  |
| Au | -2.4031474577 | -1.8544273859 | -0.0204378832 |
| Au | 3.8211672211  | -1.6136887249 | 1.0306941540  |
| Au | 1.1022476593  | 2.8516074085  | -2.9305396882 |
| Au | -0.3083980969 | 2.2509280602  | -0.7686064504 |
| Au | -2.0753268736 | -4.4791608828 | -0.4925160183 |
| Au | 1.7638706021  | 0.5865906133  | -1.6498879376 |
| Si | 2.0557698370  | -1.5491245738 | -0.6030907688 |

Isomer (c)

|    |               |               |               |
|----|---------------|---------------|---------------|
| Au | 4.5090066253  | -1.1205806092 | -0.7034871485 |
| Au | 2.1876290867  | -2.4463746823 | -0.5400556321 |
| Au | 2.4059145467  | 0.4113108206  | -0.1117573865 |
| Au | -0.0548576777 | -4.8761630870 | 1.5479455630  |
| Au | -4.5321158448 | -1.0306054674 | -0.6892002821 |
| Au | 0.0445811746  | 4.5483172518  | 0.3382330530  |

|    |               |               |               |
|----|---------------|---------------|---------------|
| Au | -2.2362483305 | -2.4013743085 | -0.5354513839 |
| Au | 0.0179736752  | 1.7837989954  | 0.2079699110  |
| Au | -2.3974005206 | 0.4581256336  | -0.0997719620 |
| Au | -0.0084121610 | -0.9026377085 | 0.1474802295  |
| Au | 2.3628217113  | 3.1164744881  | 0.2226957577  |
| Au | -2.3010482601 | 3.1609857632  | 0.2399854003  |
| Si | -0.0343200729 | -3.4226322120 | -0.3111955591 |

Isomer (d)

|    |               |               |               |
|----|---------------|---------------|---------------|
| Au | -1.8715439622 | 0.9914557613  | 0.9777514181  |
| Au | -1.1763420182 | -1.5190355518 | 1.7173889174  |
| Au | 1.3166384377  | -2.3838461132 | 0.9281485337  |
| Au | 0.8910344331  | 0.3293142852  | 1.4646694579  |
| Au | -2.2132411470 | -1.0770335806 | -0.9232274638 |
| Au | 2.7700692294  | -0.5455075414 | -0.5674256660 |
| Au | 2.7259531928  | 2.0711621106  | 0.2602214910  |
| Au | 0.1520377505  | 2.9030928385  | 0.6003202157  |
| Au | 0.7107772307  | 1.0769844152  | -1.5535037862 |
| Au | -1.0977090875 | -3.5112246603 | -0.2034645928 |
| Au | -2.3573743653 | 3.1375548878  | -0.6125418865 |
| Au | 0.4409434926  | -1.6706441836 | -1.6264609254 |
| Si | -1.7035393977 | 1.1271938323  | -1.8754300842 |

Isomer (e)

|    |               |               |               |
|----|---------------|---------------|---------------|
| Au | -0.3347706672 | 0.6214501351  | -0.4253268104 |
| Au | -0.1159235742 | -4.5139973215 | 0.1606011969  |
| Au | 2.0289257475  | 1.9676325581  | -0.0199033817 |
| Au | 4.6697151694  | 1.7729153221  | 0.5219217902  |
| Au | -2.7499556759 | -3.4489050898 | 0.4314158558  |
| Au | -2.6025313722 | 4.6428219573  | 0.0639524441  |
| Au | 3.3731608263  | -0.5010547547 | 0.0073686815  |
| Au | -2.7363551025 | 1.9489998470  | 0.1464180094  |
| Au | 2.0292744941  | -2.8329755343 | 0.0662577974  |
| Au | -0.2851160152 | 3.3047268668  | -0.0961782352 |
| Au | -0.6581453465 | -2.0409336174 | -0.6216662811 |
| Au | -2.8452255535 | -0.6981736877 | 0.2447565048  |
| Si | 1.3999305709  | -0.9129760017 | -1.4488282835 |

The Cartesian coordinates of the top-five lowest-lying isomers of Au<sub>12</sub>Ge<sup>-</sup>

Isomer (a)

|    |               |               |               |
|----|---------------|---------------|---------------|
| Au | 2.8096185450  | 1.8101187806  | -0.0275865355 |
| Au | 2.3049225067  | -2.9944468926 | -0.1121341454 |
| Au | -0.0001865286 | 1.8794479055  | 0.1630317661  |
| Au | 1.3713677292  | 4.1748752519  | -0.1879823347 |

|    |               |               |               |
|----|---------------|---------------|---------------|
| Au | -2.3116229409 | -2.9911713189 | -0.1149569227 |
| Au | 1.3150040505  | -0.4896218780 | 0.3394798941  |
| Au | -2.8099160572 | 1.8140316141  | -0.0299568884 |
| Au | -0.0041125321 | -4.4851162622 | -0.4794039296 |
| Au | -3.9290002954 | -0.7080661371 | -0.0672724687 |
| Au | -1.3189329094 | -0.4877248253 | 0.3378676582  |
| Au | -1.3683225329 | 4.1768427215  | -0.1915396956 |
| Au | 3.9251993963  | -0.7135066953 | -0.0619994094 |
| Ge | -0.0040033661 | -2.6332166717 | 1.2440140663  |

Isomer (b)

|    |               |               |               |
|----|---------------|---------------|---------------|
| Au | -1.8630629552 | -2.5138428099 | 0.1260639882  |
| Au | -3.5966966819 | -0.5561345355 | -0.6319343873 |
| Au | 2.8649404264  | -1.5613873401 | -0.0767838168 |
| Au | -3.1066126177 | 2.0672231843  | -0.0378745465 |
| Au | 4.7375891979  | 0.3568121919  | -0.1598773277 |
| Au | 1.2605526152  | 3.8925638644  | -0.1388140886 |
| Au | -0.4197989509 | 1.8332697075  | 0.3435644220  |
| Au | 0.8893471985  | -3.3408579650 | -0.0374064629 |
| Au | 2.2616203327  | 1.3229170180  | 0.0543866638  |
| Au | -1.4615164514 | 4.2955226576  | -0.0805777979 |
| Au | -1.1473602302 | -5.0844658328 | -0.1189841232 |
| Au | 0.3261006230  | -0.7148050914 | 0.3043373252  |
| Ge | -2.0048587155 | -0.0747332548 | 1.2818743952  |

Isomer (c)

|    |               |               |               |
|----|---------------|---------------|---------------|
| Au | -2.7810186410 | -0.0047656966 | -0.7136799625 |
| Au | -1.9071144222 | -5.1236589209 | -0.1317504633 |
| Au | 2.9800855884  | 0.0052400358  | -0.0272665941 |
| Au | 2.8633371235  | 2.7821509906  | -0.2423398525 |
| Au | 0.4813389497  | 4.0138891708  | -0.1311916000 |
| Au | -1.9076200543 | 2.4198076375  | 0.2056397641  |
| Au | 0.6310650756  | -1.3432300607 | 0.4334711858  |
| Au | 0.4964598166  | -4.0127221825 | -0.1269649986 |
| Au | 2.8743895262  | -2.7726844260 | -0.2355111285 |
| Au | -1.9260416152 | 5.1167813943  | -0.1312241025 |
| Au | -1.8985252436 | -2.4264755515 | 0.2028749754  |
| Au | 0.6259599717  | 1.3452509386  | 0.4309687598  |
| Ge | -1.4213004633 | -0.0025671951 | 1.3977655074  |

Isomer (d)

|    |              |               |               |
|----|--------------|---------------|---------------|
| Au | 0.3350521090 | -3.7783327754 | -0.0963652515 |
| Au | 2.8836357910 | -2.8693943888 | -0.2598423397 |
| Au | 1.0548487331 | 4.0877167991  | -0.1476574758 |

|    |               |               |               |
|----|---------------|---------------|---------------|
| Au | -4.0229246512 | 2.9370486761  | -0.3635377320 |
| Au | -2.9624265307 | 0.4771240466  | -0.1347605101 |
| Au | -1.8528485116 | -1.9243536118 | 0.1210218347  |
| Au | 0.9734882533  | 1.4668043389  | 0.3750899141  |
| Au | 3.2835201949  | -0.0814428429 | -0.0757790863 |
| Au | 3.3865233366  | 2.6152744473  | -0.2546677090 |
| Au | -2.1719213084 | -4.6054559283 | -0.2392219026 |
| Au | 0.8517902910  | -1.1937390657 | 0.4465925061  |
| Au | -1.3771239474 | 2.7863848199  | 0.0967000648  |
| Ge | -1.0310955532 | 0.2290978116  | 1.5179476045  |

Isomer (e)

|    |               |               |               |
|----|---------------|---------------|---------------|
| Au | -0.5038172394 | 2.2118448000  | -0.7209212386 |
| Au | 3.1735380117  | -0.7662742690 | -1.0011862087 |
| Au | 0.5683947933  | -0.1420328297 | -1.6515477374 |
| Au | -0.6647260164 | -4.0057621404 | 0.7735132183  |
| Au | -3.2880450693 | 2.0225363660  | -0.6921991211 |
| Au | 0.4926854215  | 1.0460220398  | 1.8885667771  |
| Au | -0.1007523476 | -1.5390359452 | 1.8241374381  |
| Au | 1.2508519284  | -2.5785744302 | -0.4943448973 |
| Au | -1.5394744071 | -1.9142433910 | -0.8387821552 |
| Au | 1.0546793437  | 3.6173582816  | 1.1401706925  |
| Au | 2.2542862135  | 1.6644075338  | -0.3081298773 |
| Au | -1.9604047080 | 0.2401119531  | 0.8687649347  |
| Ge | -1.9565280191 | 0.3178747274  | -2.0644904574 |

The Cartesian coordinates of the top-five lowest-lying isomers of Au<sub>12</sub>Sn<sup>-</sup>

Isomer (a)

|    |               |               |               |
|----|---------------|---------------|---------------|
| Au | 1.7038360073  | 3.3075687177  | 0.2204814966  |
| Au | -3.9679818477 | -0.1061728421 | 0.1949597715  |
| Au | 2.1371948988  | -3.9014031522 | 0.1879522060  |
| Au | 0.3574937015  | -1.9067163054 | -0.2139421674 |
| Au | 1.2051630325  | 0.6709426128  | -0.3859641747 |
| Au | -0.5490604241 | -4.4173521828 | 0.2113292144  |
| Au | -2.8183979755 | 2.4391481878  | 0.2592753156  |
| Au | -2.4054188678 | -2.3730377376 | 0.0946968611  |
| Au | -0.8424305103 | 4.3763319903  | 0.6423386475  |
| Au | 3.7138713199  | 1.3697324923  | 0.1225763625  |
| Au | -1.3887355761 | 0.1724653943  | -0.3622387521 |
| Au | 3.1014804160  | -1.3151546377 | 0.0418832605  |
| Sn | -0.5368197137 | 2.6880948794  | -1.4612455382 |

Isomer (b)

|    |              |              |               |
|----|--------------|--------------|---------------|
| Au | 1.9314271295 | 3.9989647156 | -0.6216804592 |
|----|--------------|--------------|---------------|

|    |               |               |               |
|----|---------------|---------------|---------------|
| Au | -3.8261330784 | -0.0709270284 | -0.0459355756 |
| Au | -2.4353952081 | 2.3041573704  | -0.0580516982 |
| Au | 0.2765955204  | 2.2119723666  | 0.5244761387  |
| Au | -2.3484759850 | -2.3924481003 | -0.0642277029 |
| Au | 2.8564510191  | 1.4118329909  | -0.0402502579 |
| Au | -0.6281532638 | -4.4180210504 | -0.7710195547 |
| Au | 2.0776390455  | -3.9262210152 | -0.6244208171 |
| Au | 2.9075144504  | -1.3081368699 | -0.0396381574 |
| Au | 0.3578427815  | -2.2019270582 | 0.5221062765  |
| Au | -1.2165171026 | -0.0234513446 | 0.7560531599  |
| Au | -0.7908352454 | 4.3933174315  | -0.7625303501 |
| Sn | 1.3659029431  | 0.0235654692  | 1.9612214653  |

Isomer (c)

|    |               |               |               |
|----|---------------|---------------|---------------|
| Au | -2.2405233570 | 1.4418478350  | 0.0864246311  |
| Au | -1.1283948798 | 3.9442898321  | -0.2631689095 |
| Au | 3.1624325730  | 1.9292573735  | -0.1319526774 |
| Au | -2.9797402605 | -1.3927120867 | -0.0642842330 |
| Au | -4.7669673314 | 0.6047418508  | -0.1045425667 |
| Au | 3.5895090304  | -0.7472324299 | -0.6232783132 |
| Au | -0.3908705601 | -0.6914319184 | 0.3522070058  |
| Au | 1.6031732516  | 4.2141779993  | -0.2387634933 |
| Au | 0.8102464137  | -5.1395387790 | -0.2685315552 |
| Au | -1.0960329491 | -3.2663048489 | -0.0927079343 |
| Au | 0.4645912094  | 1.8309558263  | 0.3502359835  |
| Au | 1.7132334916  | -2.6231274201 | 0.0082072715  |
| Sn | 2.0789204046  | -0.1871536687 | 1.5622735138  |

Isomer (d)

|    |               |               |               |
|----|---------------|---------------|---------------|
| Au | 1.6473229470  | -1.7459998875 | 0.1502840171  |
| Au | 2.0419595706  | 2.9812790248  | 0.0269160834  |
| Au | -0.4033272923 | -0.6098819326 | 1.9067954134  |
| Au | -2.1027136132 | 3.3500542138  | -0.1614012415 |
| Au | -2.1905280418 | 0.6192187065  | -0.1428754846 |
| Au | 2.1772511561  | 0.5253177474  | -1.1824287185 |
| Au | -0.1386485004 | 2.0076784285  | -1.5071449548 |
| Au | -0.0724356729 | -3.3230310243 | 1.6024277508  |
| Au | 0.0929970568  | -3.4507261879 | -1.3538387711 |
| Au | -1.9372326355 | -2.0278362290 | 0.0015119835  |
| Au | -0.2270255701 | 2.0557694928  | 1.4566110752  |
| Au | -0.2383244631 | -0.7591042237 | -1.8427458502 |
| Sn | 2.1849033169  | 0.6269304949  | 1.6900904680  |

Isomer (e)

|    |                             |               |
|----|-----------------------------|---------------|
| Au | 3.2592513446-1.5901221797   | 0.5799031025  |
| Au | -0.7964728060 -1.0120873515 | -1.8773725787 |
| Au | -2.1822531043 0.8699413478  | 0.0948209050  |
| Au | 1.6472969661 0.2599630883   | -0.6616591461 |
| Au | 0.2088758148 1.8329759183   | 1.4572344298  |
| Au | 0.9457027401-0.7236356112   | 2.0364719740  |
| Au | -1.7161587861 -1.7604506929 | 0.8190938009  |
| Au | -0.3423441352 1.5875731303  | -1.9904397524 |
| Au | -1.2590301569 -3.6493386293 | -1.2352091835 |
| Au | 1.5692589060 3.0667215274   | -0.6574828978 |
| Au | -1.2531034240 3.4750560230  | -0.1718585333 |
| Au | 0.8685442307-2.4750740494   | -0.1439716493 |
| Sn | -1.5968400895 0.1695071696  | 2.7817155042  |
